# Supplementary material for: Normal human dermis contains distinct populations of CD11c+BDCA-1+ dendritic cells and CD163+FXIIIA+ macrophages
Source: JCI journal article supplement (doi:10.1172/jci32282), 2007-09-04
Supplement: sd1 [file 1]

598 **Table S1: Antibodies used for immunofluorescence of normal tissue**

| Antigen                    | Manufacturer       | Clone <sup>a</sup>     | Iso   | Dil   | Amplification/<br>detection <sup>b</sup> |
|----------------------------|--------------------|------------------------|-------|-------|------------------------------------------|
| CD11c                      | BD Pharmingen      | B-ly6                  | IgG1  | 1:100 | Goat anti-mouse IgG1-A488                |
| CD11c- A488                | BD Pharmingen      | B-ly6                  | IgG1  | 1:10  | Nil additional <sup>c</sup>              |
| Factor XIIIa               | Enzyme<br>Research | AP Polyclonal<br>Sheep | Nil   | 1:100 | Donkey anti-sheep-A568                   |
| HLA-DR-FITC                | BD                 | L243                   | IgG2a | 1:100 | Goat anti-FITC-A488                      |
| DEC-<br>205/CD205          | RM Steinman        | MG38                   | IgG2b | 1:100 | Goat anti-mouse IgG2b-A568               |
| CD1a-FITC                  | Pharmingen         | HI149                  | IgG1  | 1:100 | Goat anti-FITC-A488                      |
| Langerin/CD2<br>07         | Immunotech         | DCGM4                  | IgG1  | 1:100 | Goat anti-mouse IgG1-A568                |
| DC-<br>SIGN/CD209-<br>FITC | BD Pharmingen      | DCN46                  | IgG2b | 1:50  | Goat anti-FITC-A488                      |
| DC-LAMP/<br>CD208-PE       | Immunotech         | 104.G4                 | IgG1  | 1:50  | Goat anti-mouse IgG1-A568                |
| CD14-A488                  | BD Pharmingen      | M5E2                   | IgG2a | 1:100 | Goat anti-mouse IgG2a-A488               |
| BDCA-1                     | Miltenyi           | AD5-8E7                | IgG2a | 1:100 | Goat anti-mouse IgG2a-A568               |
| BDCA-2                     | Miltenyi           | AC144                  | IgG1  | 1:100 | Goat anti-mouse IgG1-A568                |
| CD123                      | BD                 | 9F5                    | IgG1  | 1:100 | Goat anti-mouse IgG1-A488                |
| MMR/CD206                  | GeneTex            | 15-2                   | IgG1  | 1:100 | Goat anti-mouse IgG1-A568                |
| CD68                       | BD Pharmingen      | Y1/82A                 | IgG2b | 1:100 | Goat anti-mouse IgG2b-A488               |
| CD11b                      | BD Pharmingen      | ICRF44                 | IgG1  | 1:10  | Goat anti-mouse IgG1-A568                |
| CD45-FITC                  | BD Pharmingen      | HI30                   | IgG1  | 1:100 | Goat anti-FITC-A488                      |
| CD163-FITC                 | Acris              | 5C6-FAT                | IgG1  | 1:100 | Goat anti-FITC-A488                      |
| CD63-FITC                  | BD Pharmingen      | H5C6                   | IgG1  | 1:100 | Goat anti-FITC-A488                      |
| RFD7                       | Abcam              | RFD7                   | IgG1  | 1:100 | Goat anti-mouse IgG1-A568                |

599 <sup>a</sup>All are murine monoclonals unless stated

600 <sup>b</sup>All amplification/ detection antibodies are from Invitrogen /Molecular Probes unless stated

601 <sup>c</sup>CD11c conjugated to A488 gives high non-specific epidermal staining. This was used where there were

602 two IgG1 antibodies.

603

604

605 **Table S2: Antibodies used for flow cytometry of normal tissue leukocytes**

| Antigen-fluorophor               | Manufacturer    | Clone <sup>a</sup>     | Iso          | Dil  |
|----------------------------------|-----------------|------------------------|--------------|------|
| BDCA-1 (CD1c)-FITC or PE         | Miltenyi        | AD5-8E7                | IgG2a        | 1:50 |
| CD11c-PE-Cy7                     | Biolegend       | 3.9                    | IgG1         | 1:33 |
| CD163-A647                       | Acris           | 5C6-FAT                | IgG1         | 1:33 |
| Factor XIIIa-A647                | Enzyme Research | AP Polyclonal<br>Sheep | Nil          | 1:33 |
| HLA-DR-APC-Cy7                   | BD Pharmingen   | L243                   | IgG2a        | 1:50 |
| CD14-PerCP Cy5.5                 | BD Pharmingen   | M5E2                   | IgG2a        | 1:25 |
| Lin-PE: CD3, CD19, CD20,<br>CD56 | Lab custom      | various                | IgG1 & IgG2b | 1:20 |
| CD1a-FITC                        | Pharmingen      | HI149                  | IgG1         | 1:20 |
| CD40-FITC                        | BD Pharmingen   | 5C3                    | IgG1         | 1:20 |
| CD80-FITC                        | BD Pharmingen   | L307.4                 | IgG1         | 1:20 |
| CD86-FITC                        | BD Pharmingen   | 2331 (FUN-1)           | IgG1         | 1:20 |
| DEC205/CD205-PE                  | Biolegend       | MG38                   | IgG2b        | 1:20 |
| MMR/CD206-FITC                   | BD Pharmingen   | 19.2                   | IgG1         | 1:20 |
| Langerin/CD207-PE                | Immunotech      | DCGM4                  | IgG1         | 1:20 |
| DC-LAMP/CD208-PE                 | Immunotech      | 104.G4                 | IgG1         | 1:20 |
| DC-SIGN/CD209-FITC               | BD Pharmingen   | DCN46                  | IgG2b        | 1:20 |
| BDCA-2-FITC                      | Miltenyi        | AC144                  | IgG1         | 1:50 |
| CD45-FITC                        | BD Pharmingen   | H130                   | IgG1         | 1:20 |

606 <sup>a</sup>All are murine monoclonals unless stated

619 **Table S3.** Results of alloMLR with normal dermal DC populations.  
620

| DAY            | DC:T cells | T cells alone <sup>a</sup> | BDCA-1 <sup>+</sup> | CD163 <sup>+</sup> <sup>d</sup> |
|----------------|------------|----------------------------|---------------------|---------------------------------|
| 6              | 1:10       | 0.5%                       | 8.6%                | 2.3%                            |
| 6              | 1:10       | 0.5%                       | 10.1%               | 3.6%                            |
| 8              | 1:10       | 1.4%                       | 9.3%                | 2.4%                            |
| 6 <sup>b</sup> | 1:50       | 1.2% <sup>c</sup>          | 64.3%               | 3.8% <sup>e</sup>               |
| 6 <sup>b</sup> | 1:100      | 1.0%                       | 25.3%               | 2.2% <sup>e</sup>               |

621 <sup>a</sup> Percent of live cells proliferating without the addition of DCs

622 <sup>b</sup> Sorted DCs pre-cultured for 2 days prior to setting up MLR; DCs cultured without  
623 cytokines induce a similar increase in proliferation

624 <sup>c</sup> Addition of the DC maturing cytokines to T cells alone does not increase proliferation

625 <sup>d</sup> First two MLRs were using Miltenyi beads to select BDCA-1<sup>+</sup> cells compared with the  
626 BDCA-1<sup>-</sup> fraction in the alloMLR; this population contains predominantly CD163+ cells  
627 (unpublished data).

628 <sup>e</sup> Ratio CD163+ cells :T cells was 1:500, and 1:250 for these two experiments  
629 respectively, due to low yields post-sorting and culturing

630

Figure S1

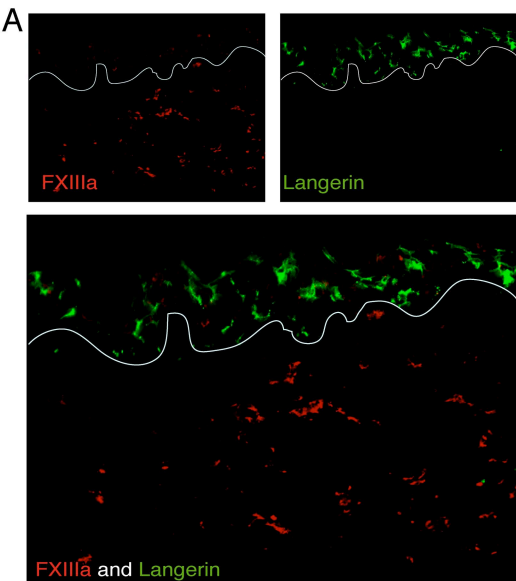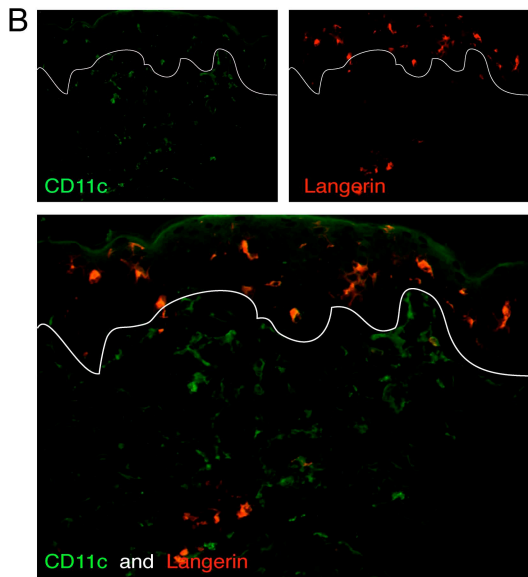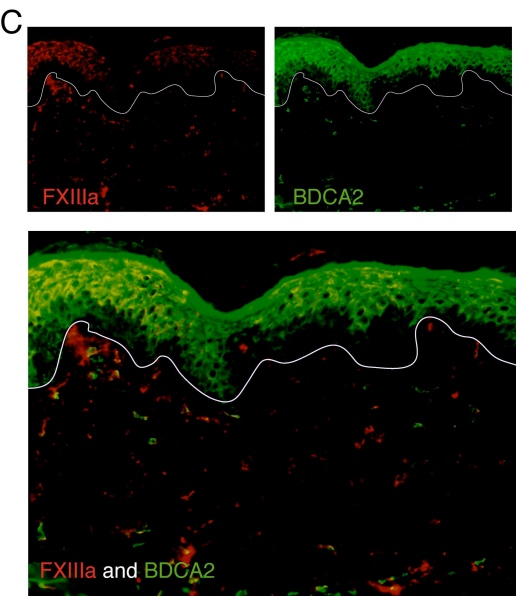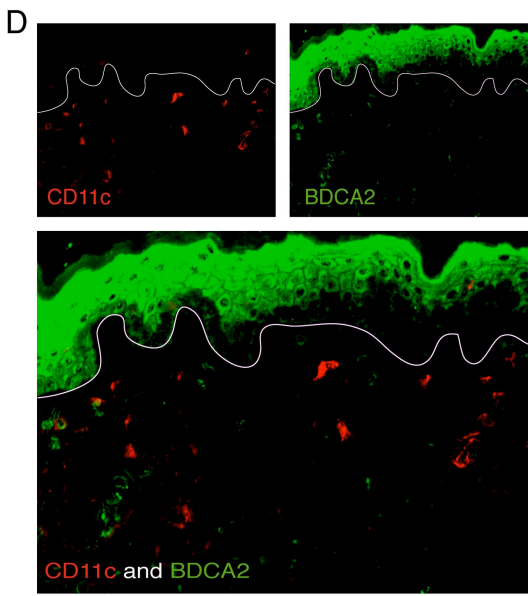

Figure S2a

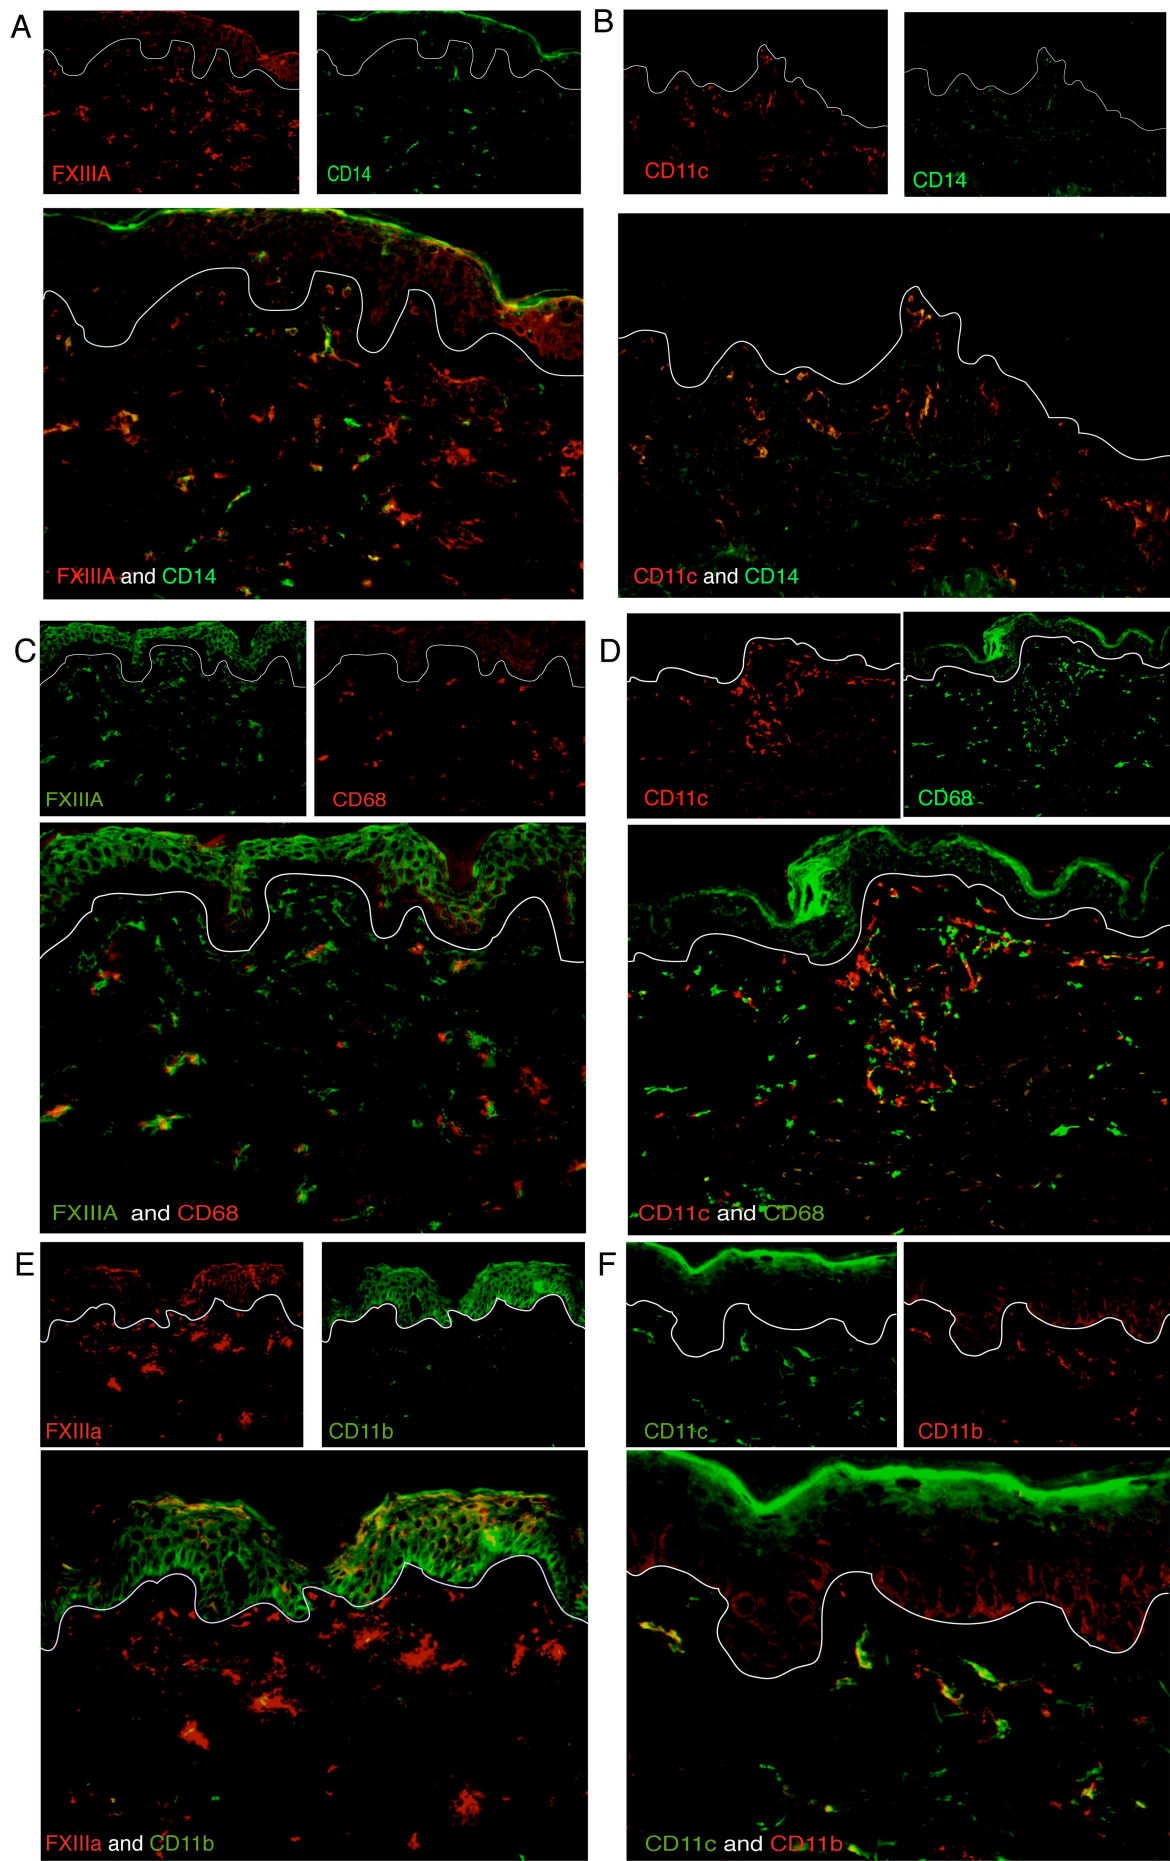

Figure S2b

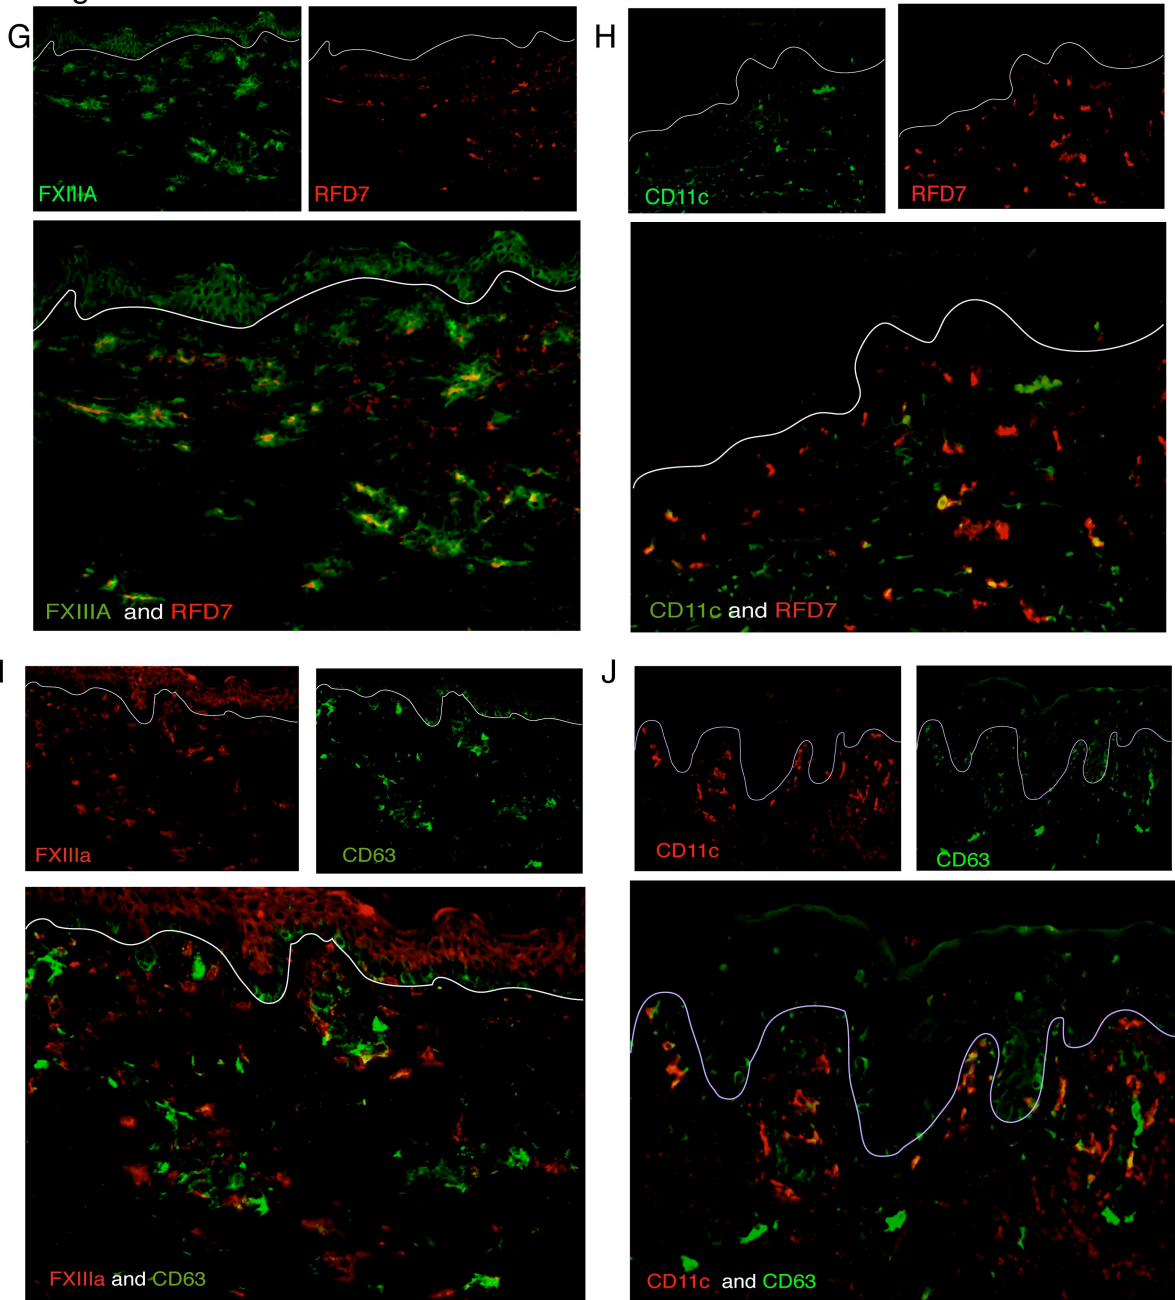

**Supplementary Figure 1. Alternate markers for Langerhans cells ( langerin) and plasmacytoid DCs (BDCA-2) do not overlap with FXIII A or CD11c. (A)** FXIII A did not overlap with Langerhans cell marker langerin, or **(C)** plasmacytoid cell marker BDCA-2. Neither did CD11c **(B and D)** respectively.

**Supplementary Figure 2A and 2B. Other potential macrophage markers stained both FXIII A<sup>+</sup> and CD11c<sup>+</sup> cells.** FXIII A<sup>+</sup> and CD11c<sup>+</sup> cells showed variable co-expression with CD14 **(A, B)**, CD68 **(C, D)**, CD11b **(E, F)**, RFD7 **(G, H)**, and CD63 **(I, J)**.
